# Supplementary material for: Modulating Polymer Ultrathin Film Crystalline Fraction and Orientation with Nanoscale Curvature
Source: MDPI journal article supplement (doi:10.3390/polym15224453), 2023-11-18
Supplement: s1 [file s1]

## Supporting Information

### Modulating Polymer Ultrathin Film Crystalline Fraction and Orientation with Nanoscale Curvature

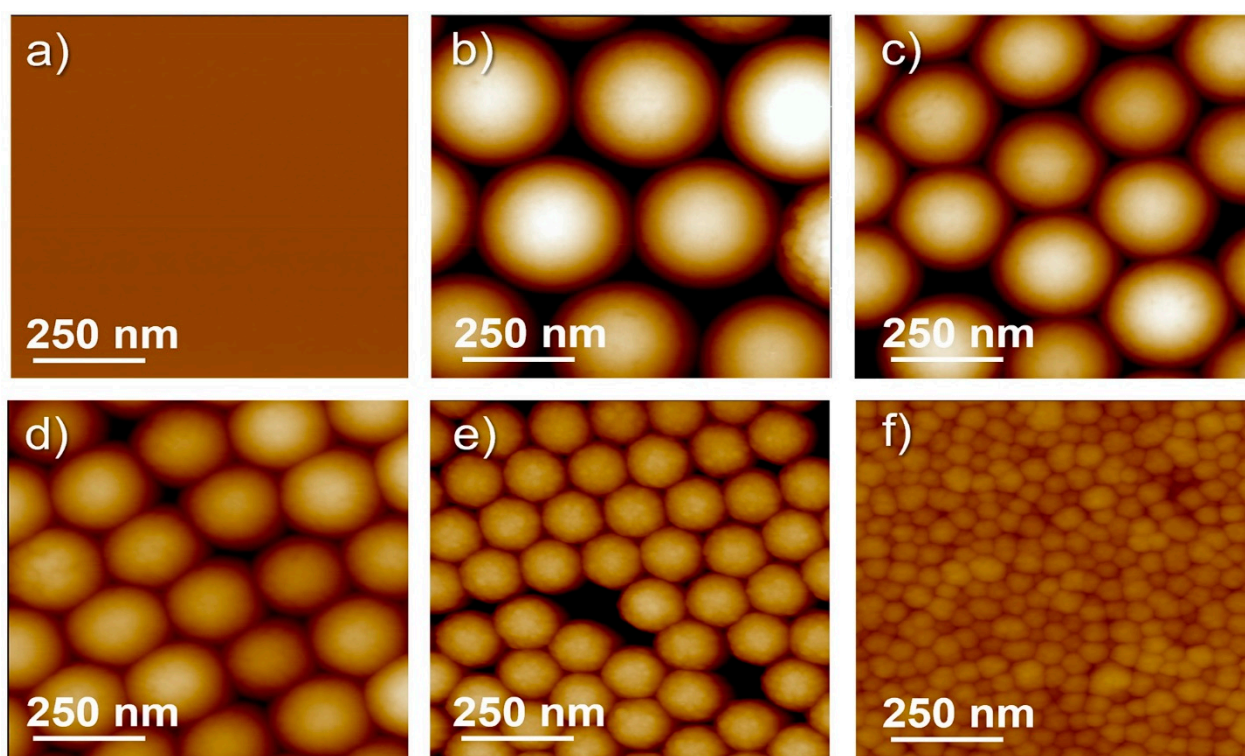

**Figure S1.**  $1 \times 1 \mu\text{m}^2$  AFM height images (Z scale 150nm) of bare flat substrate (a) and of bare structured substrates with curvature of 0.00492 nm<sup>-1</sup> (b), 0.00658 nm<sup>-1</sup> (c), 0.00851 nm<sup>-1</sup> (d), 0.0140 nm<sup>-1</sup> (e) and 0.0400 nm<sup>-1</sup> (f).

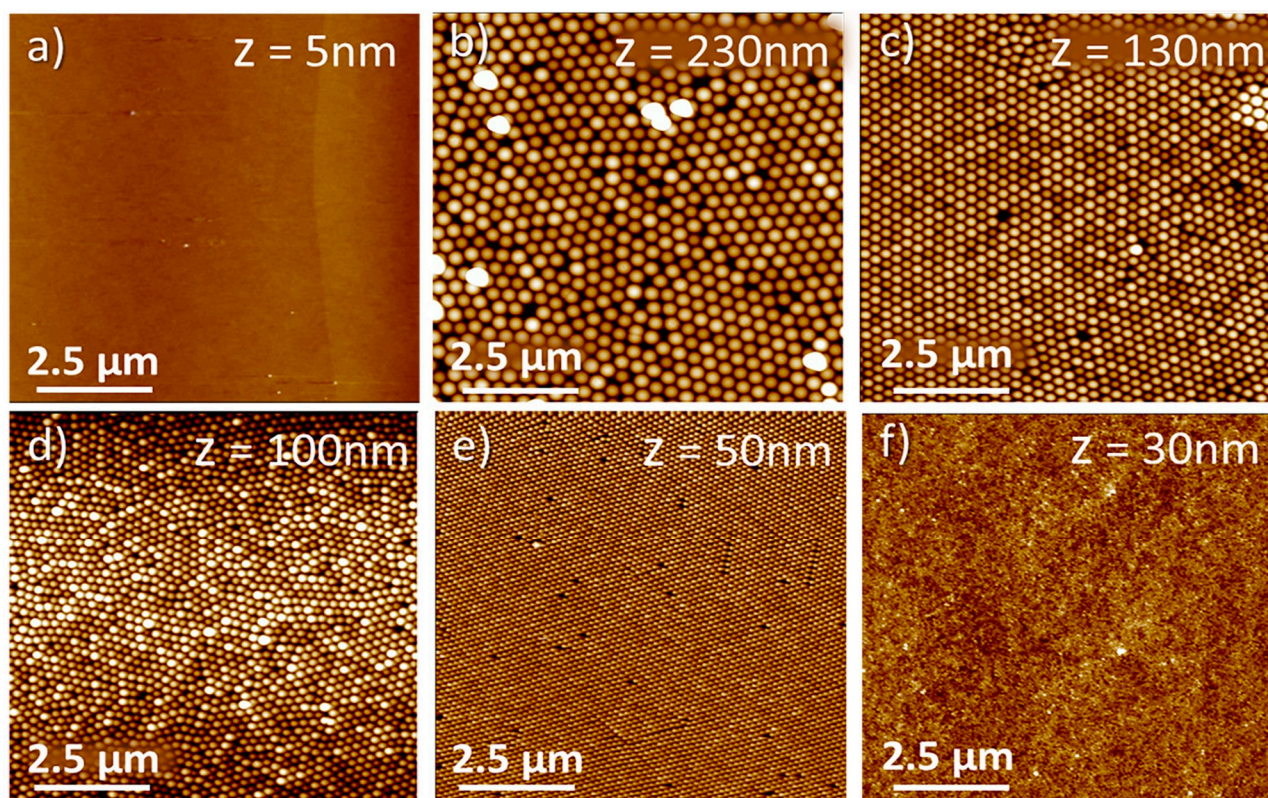

**Figure S2.**  $10 \times 10\text{ }\mu\text{m}^2$  AFM height images of bare flat substrate (a) and of bare substrates having different curvature:  $0.00492\text{ nm}^{-1}$  (b),  $0.00658\text{ nm}^{-1}$  (c),  $0.00851\text{ nm}^{-1}$  (d),  $0.0140\text{ nm}^{-1}$  (e) and  $0.0400\text{ nm}^{-1}$  (f).
